# Supplementary material
Source: Springer Nature journal article supplement (https://www.springermedizin.de/resource/supplementary/12874_2009_383_MOESM8_ESM.pdf/9434358)

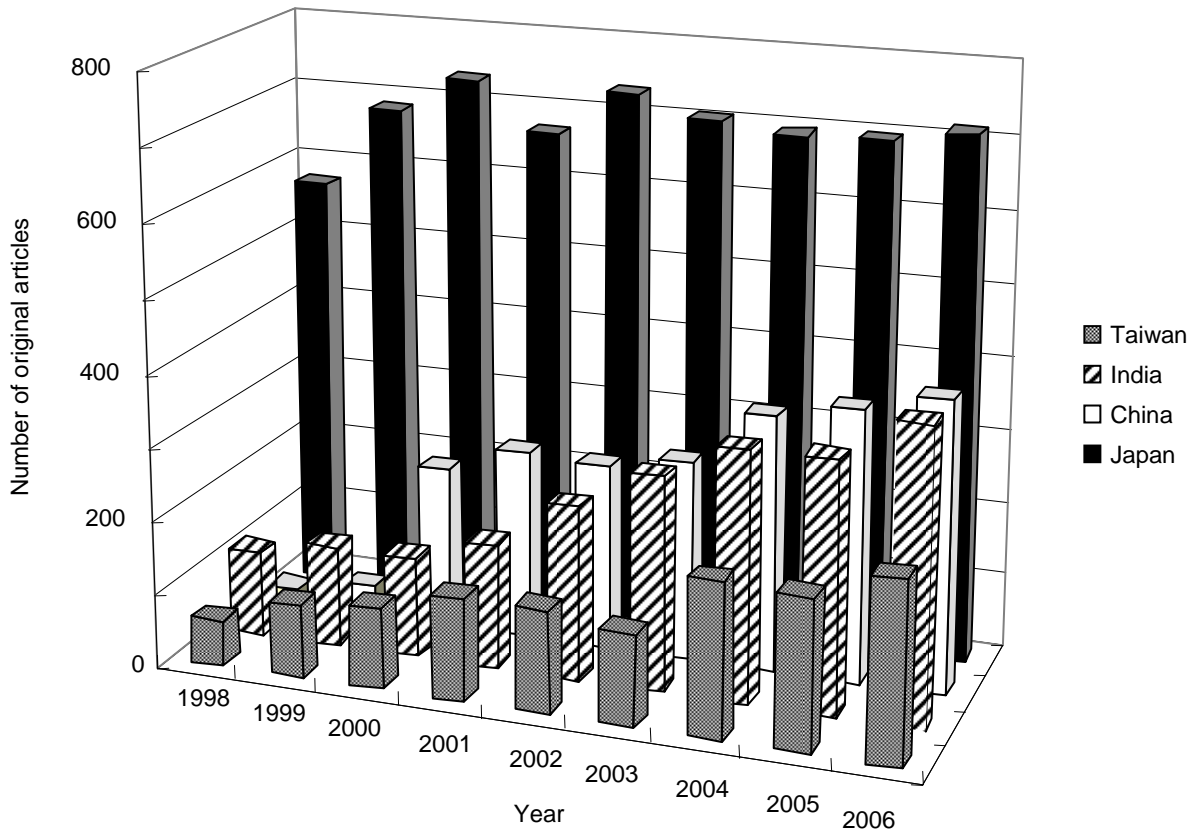

Supplement: MOESM8 [file 9434358]
